# Supplementary material for: Gut microbiota mediates the anti-obesity effect of calorie restriction in mice
Source: PubMed Central journal article supplement (PMC6115465; doi:10.1038/s41598-018-31353-1), 2018-08-29
Supplement: 41598_2018_31353_MOESM1_ESM.pdf [file 41598_2018_31353_MOESM1_ESM.pdf]

**Gut microbiota mediates the anti-obesity effect of calorie restriction in mice**

Shuo Wang, Meiqin Huang, Xue You, Jingyu Zhao, Lanlan Chen, Lin Wang, Yangjun Luo,  
and Yan Chen

**Supplemental Figures (There are 10 supplemental figures)**

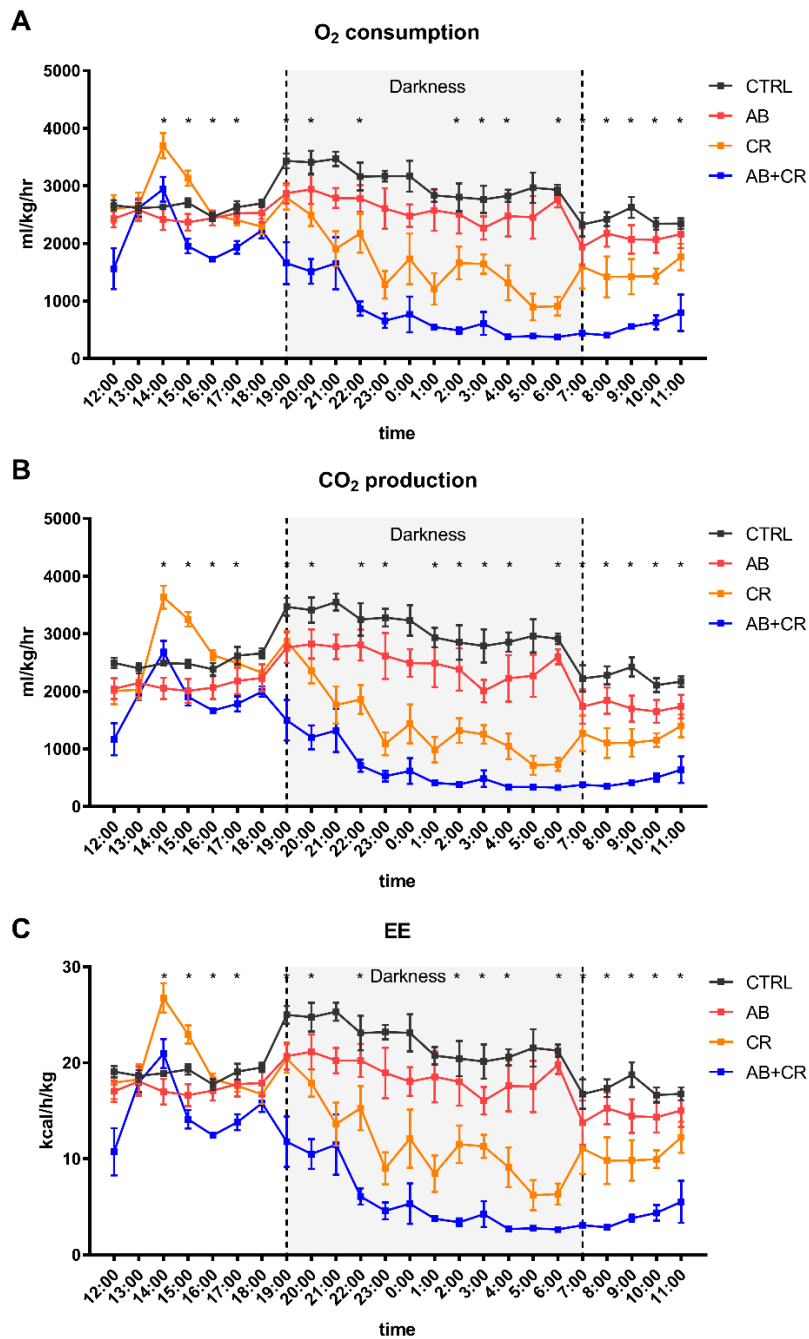

**Figure S1. Metabolic indexes as determined by metabolic cages**

(A, B) Recordings of O<sub>2</sub> consumption (A) and CO<sub>2</sub> production (B). (C) Analysis of energy expenditure (EE) adjusted to body weight. The asterisks indicate significant differences between CR and AB+CR group. Data are expressed as means  $\pm$  s.e.m. n = 4 per group. \*p < 0.05.

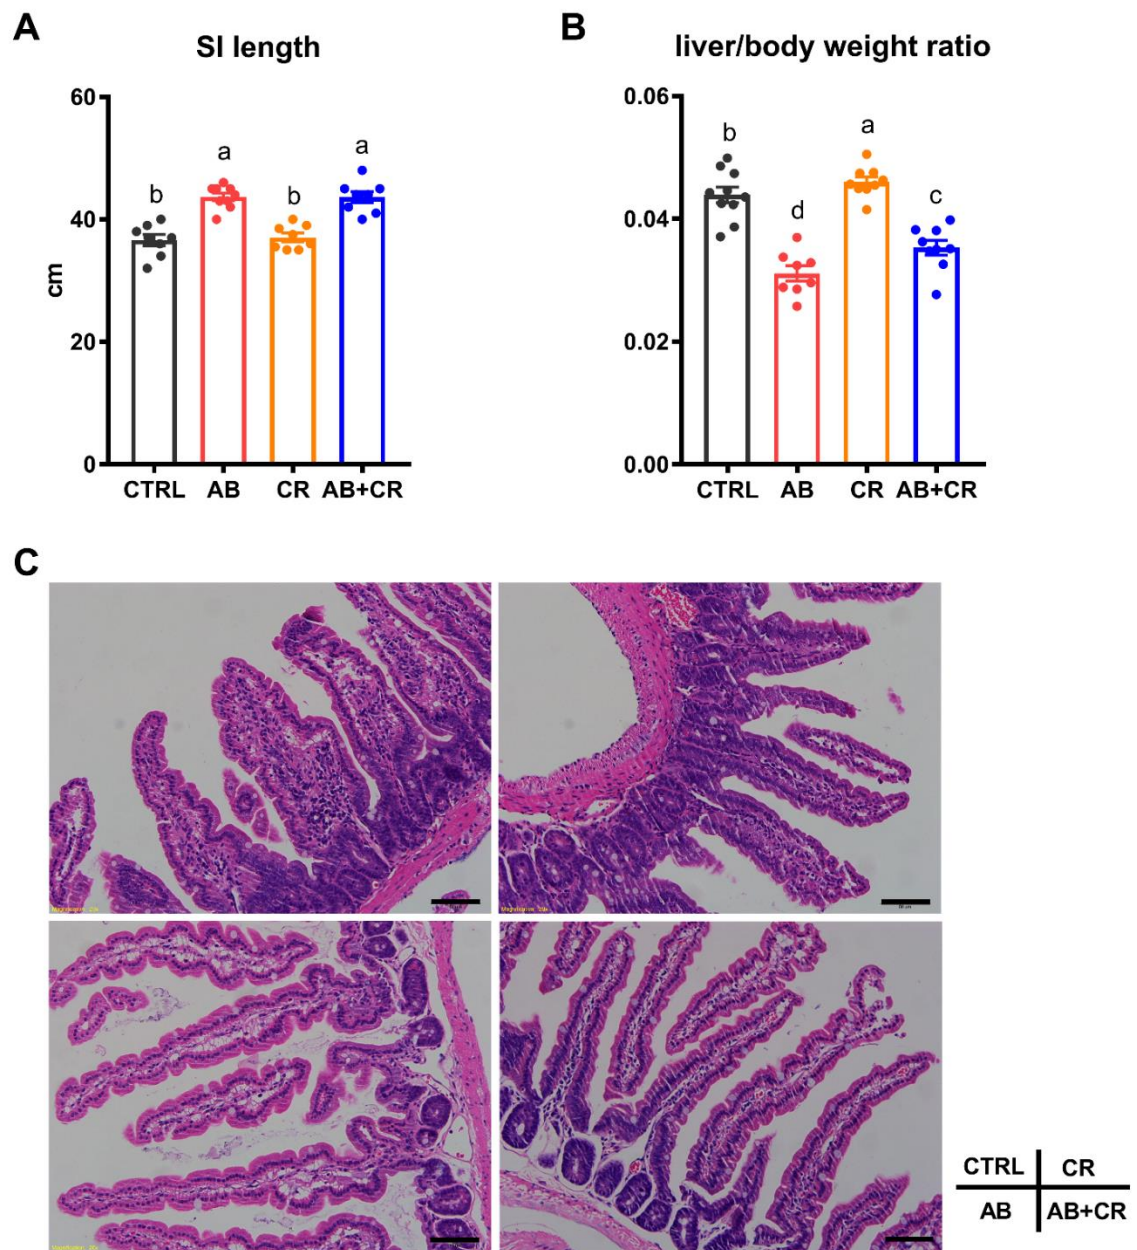

**Figure S2. Histological changes of the mice upon CR and antibiotic treatment**  
 (A, B) Differences in the length of small intestine (A) and liver/weight mass ratio (B) in different groups. Data are expressed as means  $\pm$  s.e.m, n = 8-10 per group. (C) H&E staining of jejunum. Scale bar, 50  $\mu$ m.

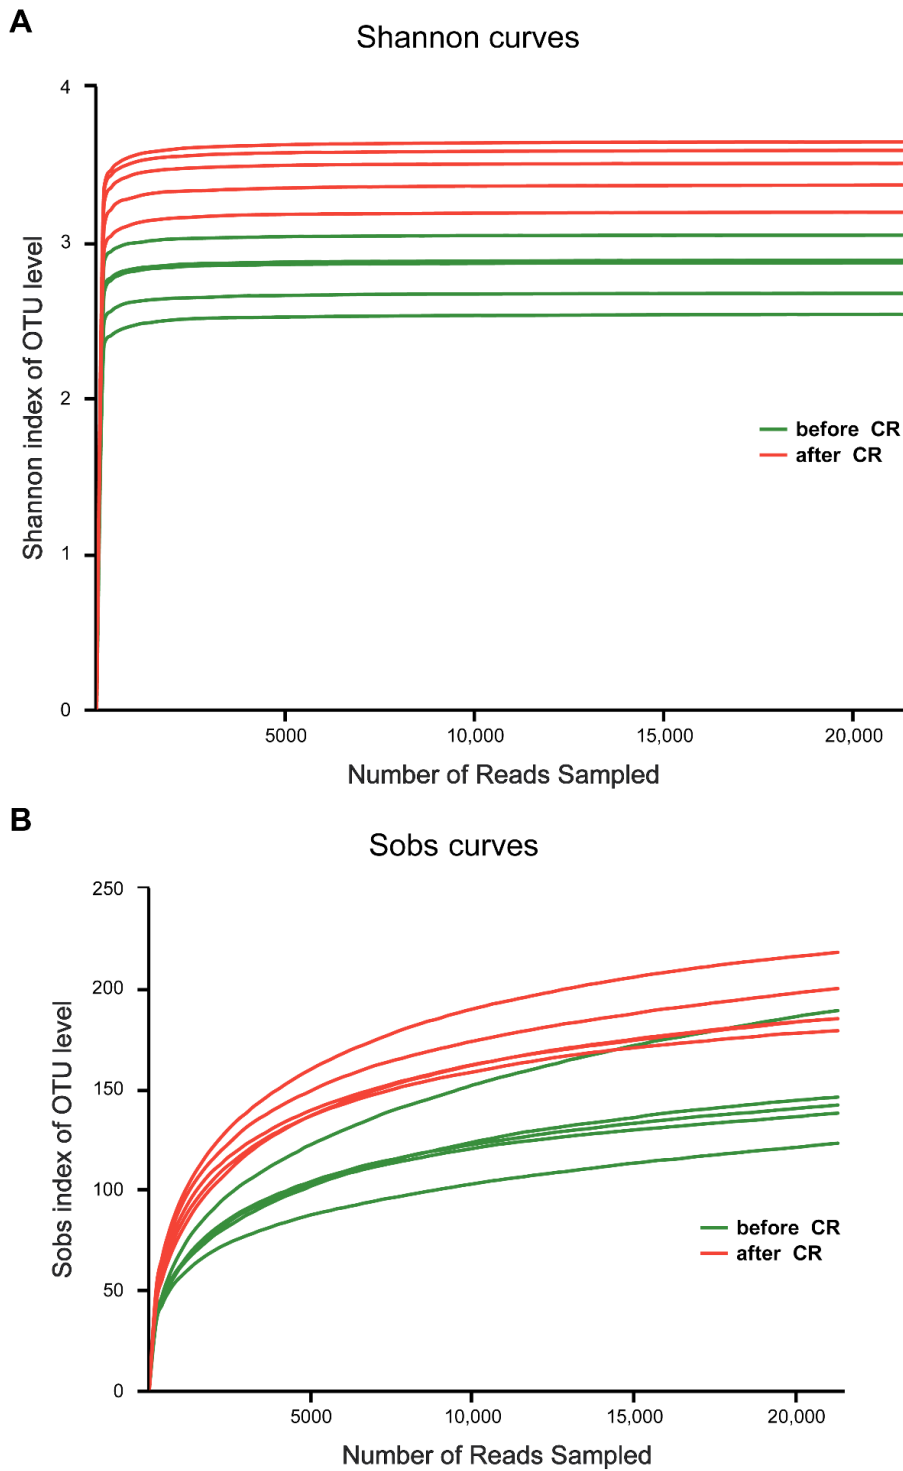

**Figure S3. Rarefaction curves of shannon index and sobs index of gut microbes as response to CR**

(A, B) Rarefaction curves of shannon index (A) and sobs index (B) of gut microbes as response to CR.

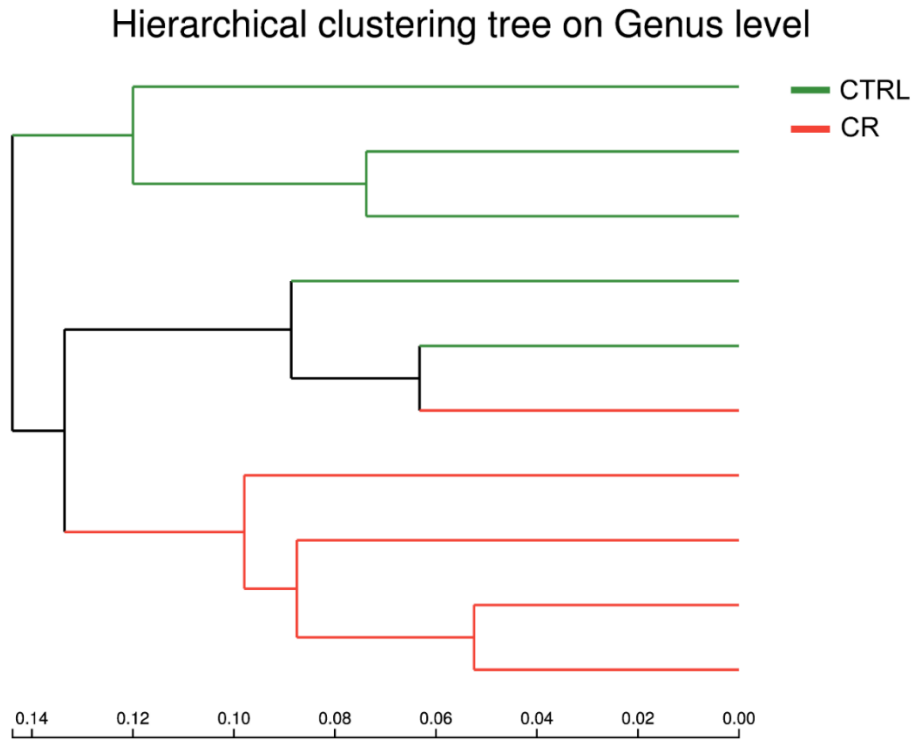

**Figure S4. Hierarchical clustering of microbes during CR on genus level**  
Hierarchical clustering of microbes during CR on genus level.

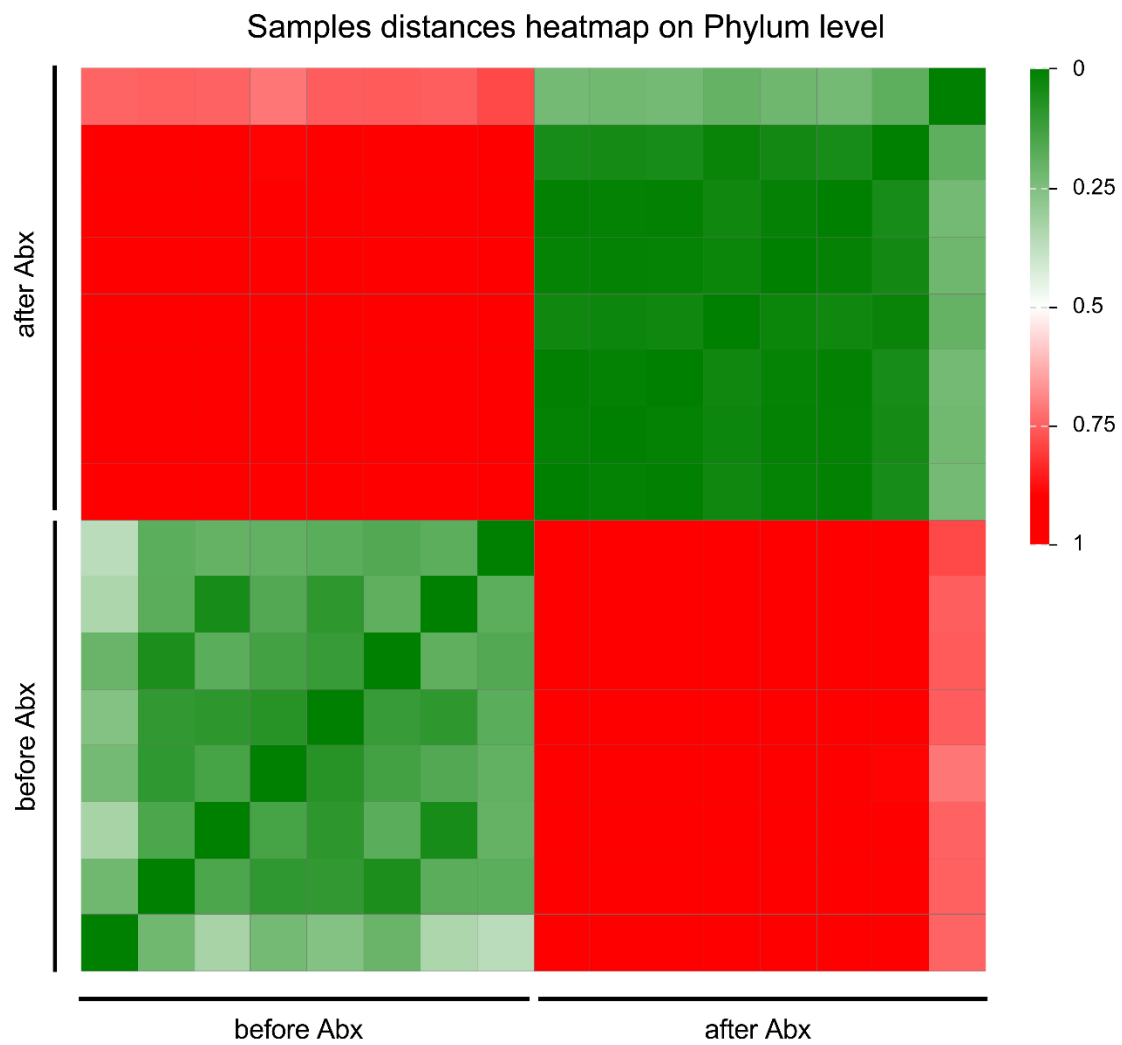

**Figure S5. Antibiotic-induced alteration of sample distances on phylum level**  
Antibiotic-induced alteration of sample distances on phylum level shown in heatmap.

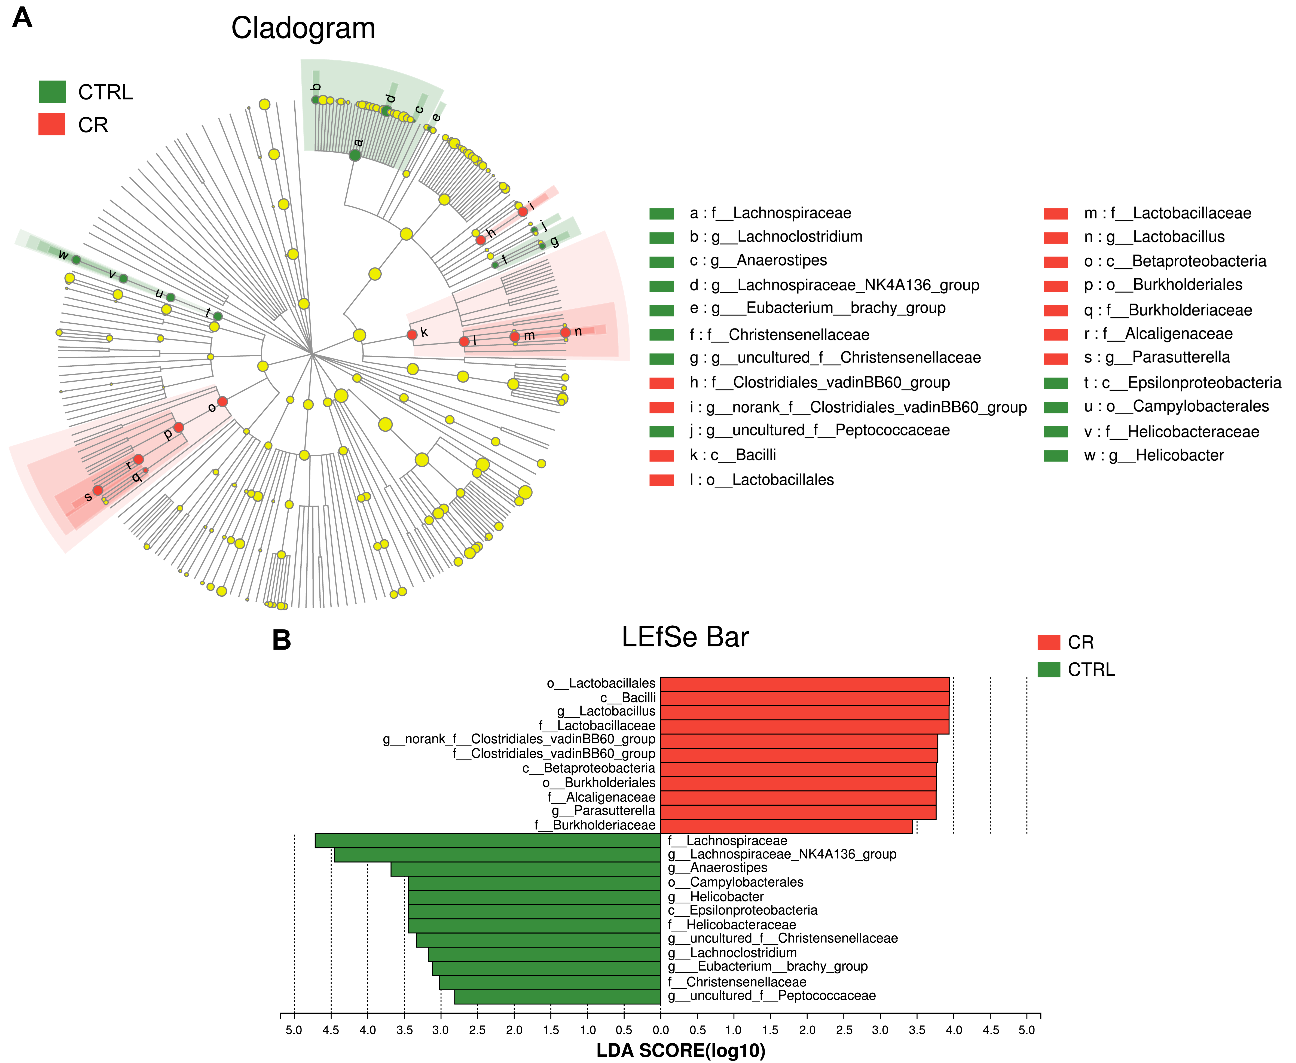

**Figure S6. LEfSe analysis of microbial community composition after CR**  
 (A, B) Linear discriminant analysis (LDA) effect size (LEfSe) analysis (A) and corresponding LDA scores (B) in the CTRL and CR groups.

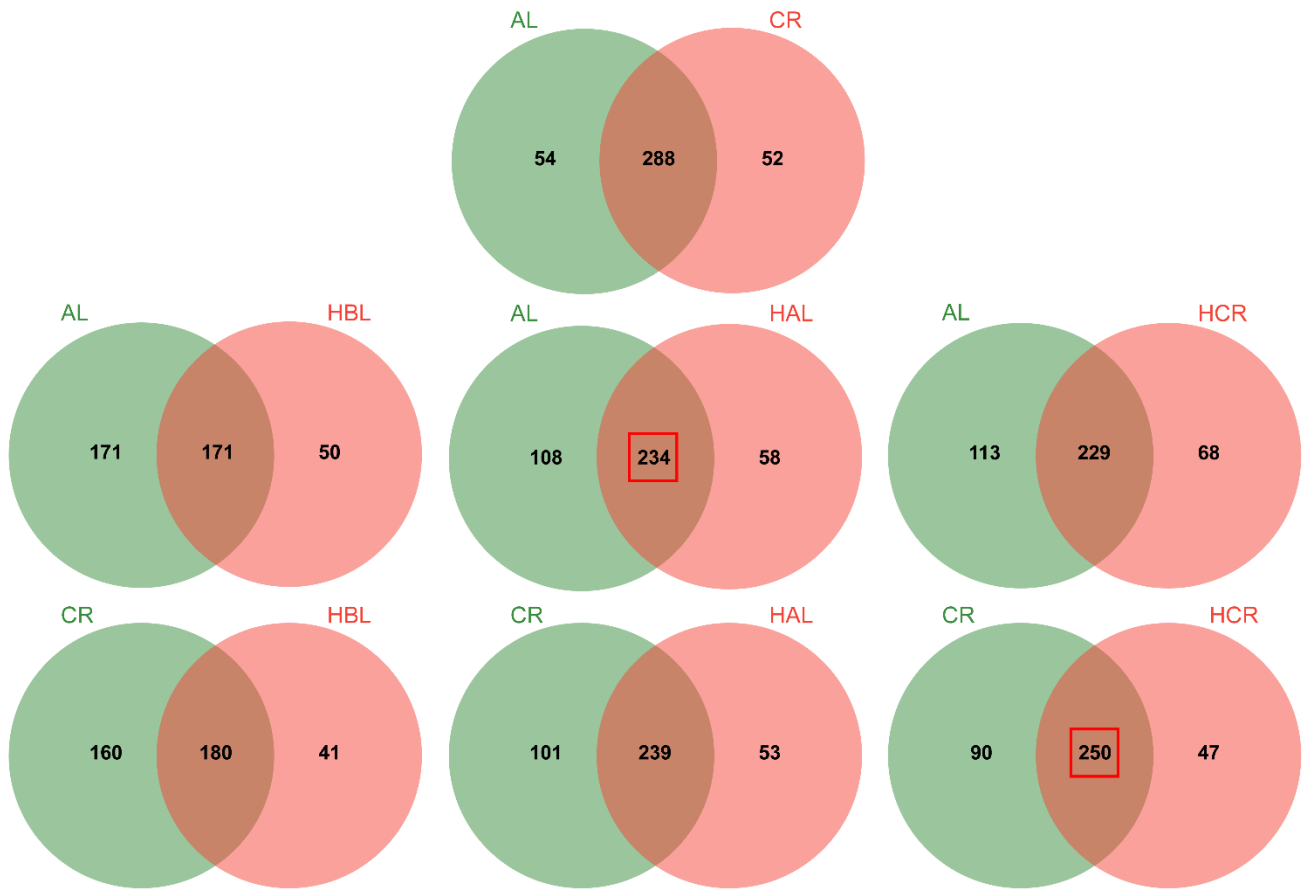

**Figure S7. Venn diagrams of microbial community composition at OTU level**  
 Venn diagrams of microbial community composition of corresponding groups at OTU level.



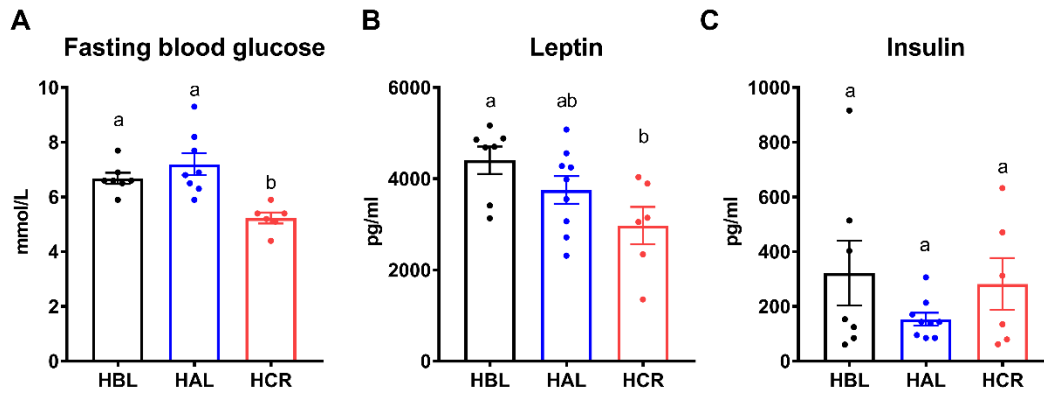

**Figure S8. Plasma levels of fasting blood glucose and metabolic hormones after FMT** (A-C) Fasting blood glucose (A), plasma leptin (B), and plasma insulin (C) of the mice fed HFD. Data are expressed as means  $\pm$  s.e.m, n = 6-9 per group.

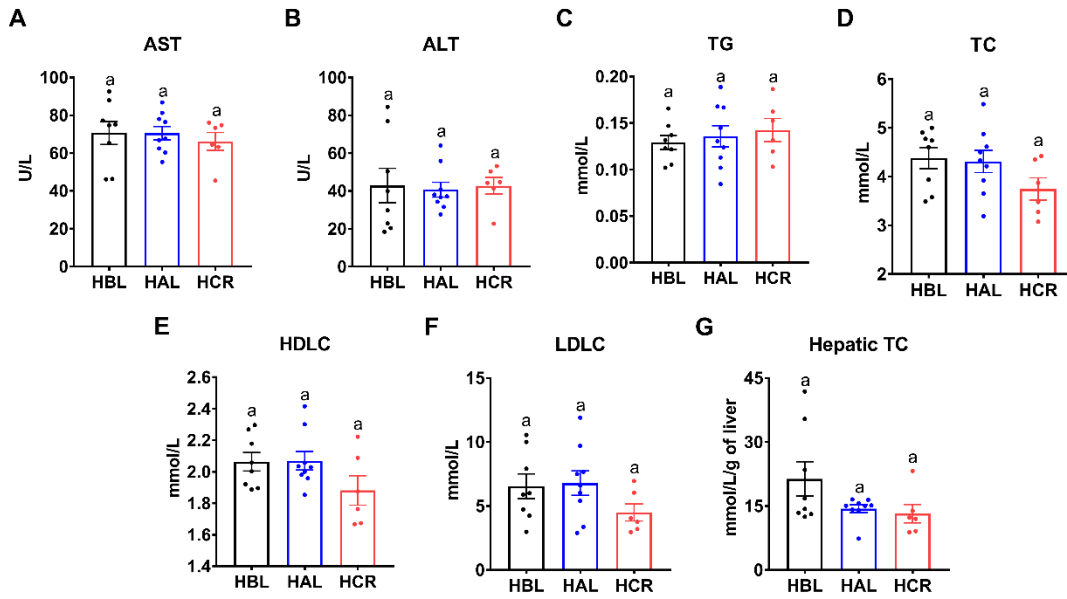

**Figure S9. Blood and hepatic parameters after FMT**

(A-F) Blood levels of AST (A), ALT (B), TG (C), TC (D), HDL-C (E), and LDL-C (F) of the mice fed HFD.

(G) Hepatic TC level in different groups.

Data are expressed as means  $\pm$  s.e.m, n = 6-9 per group.

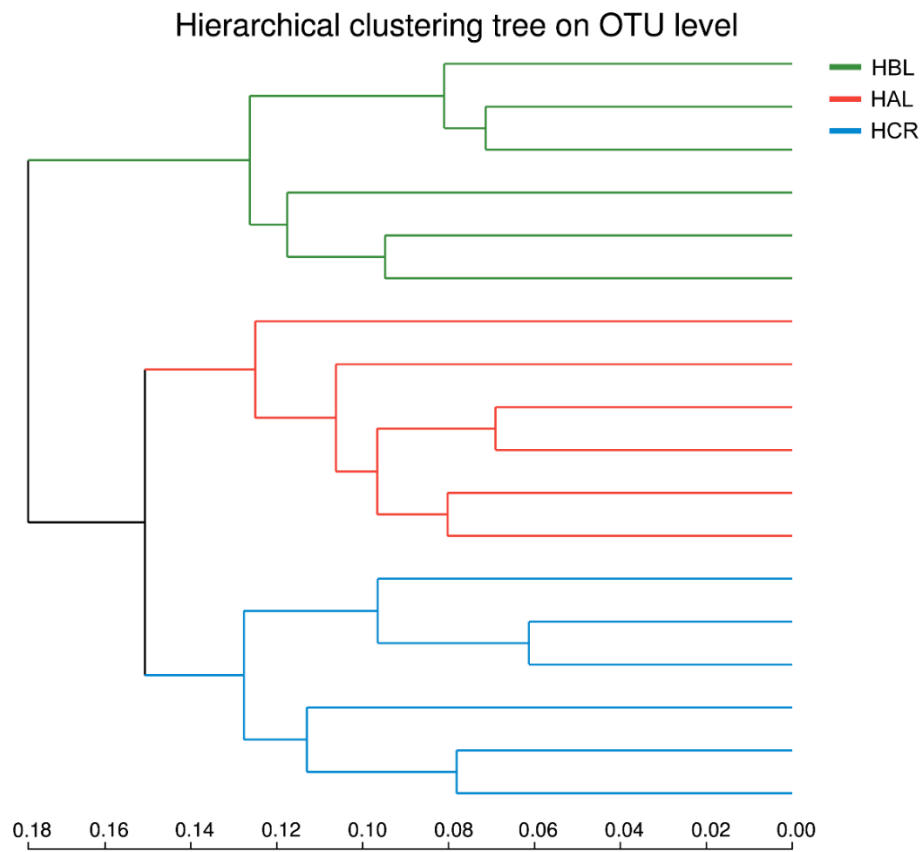

**Figure S10. Hierarchical clustering of microbes after FMT on OTU level**  
Hierarchical clustering of microbes in three groups of mice fed HFD after FMT on OTU level.
